# Supplementary material
Source: PubMed Central journal article supplement (PMC6351208)
Supplement: NIHMS990735-supplement-Supp_AppendixS1.pdf [file NIHMS990735-supplement-Supp_AppendixS1.pdf]

## **Appendix S1. Search strategy and list of search terms used by database**

### **Ovid MEDLINE and PsychINFO**

1. adolescent/or young adult/ or child/
2. adolescen\*.ab,ti.
3. t\$een\$.ab,ti.
4. (youth\$ or young or young person or young people).ab,ti.
5. middle school.ab,ti.
6. high school.ab,ti.
7. girl\$.ab,ti.
8. boy\$.ab,ti.
9. 1 or 2 or 3 or 4 or 5 or 6 or 7 or 8
- 10.exp Text messaging/
- 11.exp cell phones/ or smartphone/or text messaging/
- 12.(Cell phone or Mobile phone or Mobile device).ab,ti.
- 13.Snapchat.ab,ti.
- 14.Whatsap.ab,ti.
- 15.10 or 11 or 12 or 13 or 14
- 16.exp Sexual Behavior/
- 17.(Sexual behavior\* or Sexual behaviour\* or Sex behavior\* or Sex behaviour\* or Sex\*behavior\*).ab,ti
- 18.(Sexual risk\* or Sexual risk taking or Unsafe sex).ab,ti.
- 19.16 or 17 or 18
- 20.9 and 15 and 19

### **Embase**

1. adolescen\*:ab,ti
2. teen\*:ab,ti
3. youth\*:ab,ti
4. young:ab,ti AND (person:ab,ti OR people:ab,ti)
5. middle AND school:ab,ti
6. high and school:ab,ti

7. girl\*:ab,ti
8. boy\*:ab,ti
9. #2 OR #3 OR #4 OR #5 OR #6 OR #7 OR #8
10. sext\*:ab,ti
11. sext\*:ab,ti AND messag\*:ab,ti
12. short AND message AND service:ab,ti
13. cell AND phone:ab,ti
14. mobile AND phone:ab,ti
15. mobile AND device:ab,ti
16. snapchat:ab,ti
17. whatsapp:ab,ti
18. #10 OR #11 OR #12 OR #13 OR #14 OR #15 OR #16 OR #17
19. sexual AND behavior\*:ab,ti
20. sexual AND behaviour\*:ab,ti
21. sex AND behavior\*:ab,ti
22. sex\* AND behaviour\*:ab,ti
23. sex\* AND behavior\*:ab,ti
24. sexual AND risk\*:ab,ti
25. sexual AND risk AND taking\*:ab,ti
26. unsafe AND sex:ab,ti
27. #19 OR #20 OR #21 OR #22 OR #23 OR #24 OR #25 OR #26
28. #9 AND #18 AND #27
29. text\*:ab,ti
30. text and message\*:ab,ti
31. #18 OR #29 OR #30
32. #9 AND #27 AND #31

### **Scopus**

1. (TITLE-ABS(Adolescen\*) OR TITLE-ABS(Teen\*) OR TITLE-ABS(Youth\*) OR TITLE-ABS("Young person") OR TITLE-ABS("Young people") OR TITLE-ABS("High school") OR TITLE-ABS(Girl\*) OR TITLE-ABS(Boy\*))

2. (TITLE-ABS(text\*) OR TITLE-ABS("text messag\*") OR TITLE-ABS(Sext\*) OR TITLE-ABS("Sext messag\*") OR TITLE-ABS("Cell phone") OR TITLE-ABS("Mobile phone") OR TITLE-ABS("Short Message Service") OR TITLE-ABS("Mobile device") OR TITLE-ABS(Snapchat) OR (Whatsap))
  
3. (TITLE-ABS("Sexual behavior\*") OR TITLE-ABS("Sexual behaviour\*") OR TITLE-ABS("Sex behavior\*") OR TITLE-ABS("Sex behaviour\*") OR TITLE-ABS("Sexual risk\*") OR TITLE-ABS("Sexual risk taking") OR TITLE-ABS("Unsafe sex") OR TITLE-ABS("Sex\* behavior\*"))
  
4. (TITLE-ABS(Adolescen\*) OR TITLE-ABS(Teen\*) OR TITLE-ABS(Youth\*) OR TITLE-ABS("Young person") OR TITLE-ABS("Young people") OR TITLE-ABS("High school") OR TITLE-ABS(Girl\*) OR TITLE-ABS(Boy\*)) AND (TITLE-ABS(text\*) OR TITLE-ABS("text messag\*") OR TITLE-ABS(Sext\*) OR TITLE-ABS("Sext messag\*") OR TITLE-ABS("Cell phone") OR TITLE-ABS("Mobile phone") OR TITLE-ABS("Short Message Service") OR TITLE-ABS("Mobile device") OR TITLE-ABS(Snapchat) OR (Whatsap)) AND (TITLE-ABS("Sexual behavior\*") OR TITLE-ABS("Sexual behaviour\*") OR TITLE-ABS("Sex behavior\*") OR TITLE-ABS("Sex behaviour\*") OR TITLE-ABS("Sexual risk\*") OR TITLE-ABS("Sexual risk taking") OR TITLE-ABS("Unsafe sex") OR TITLE-ABS("Sex\* behavior\*"))

### **CINAHL (Cumulative Index to Nursing and Allied Health Literature)**

1. MM "Young Adult") OR (MH "Adolescence+") OR (MM "Minors (Legal)")
2. TI Adolescen\* OR AB Adolescen\*
3. TI Teen\* OR AB Teen\*
4. TI youth\* OR AB youth\*
5. TI young\* OR AB young\*
6. TI (young person) OR AB (young person)
7. TI (young people) OR AB (young people)
8. TI high school OR AB high school

9. TI middle school OR AB middle school
10. TI girl\* OR AB girl\*
11. TI boy\* OR AB boy\*
12. S1 OR S2 OR S3 OR S4 OR S5 OR S6 OR S7 OR S8 OR S9 OR S10 OR S11
13. MM "Text Messaging") OR (MH "Smartphone+")
14. (MH "Cellular Phone+")
15. TI sext\* OR AB sext\*
16. TI sext messag\* OR AB sext messag\*
17. TI short message service OR AB short message service
18. TI cell\* phone\* OR AB cell\* phone\*
19. TI mobile phone\* OR AB mobile phone\*
20. TI mobile device\* OR AB mobile device\*
21. TI snapchat OR AB snapchat
22. TI whatsapp OR AB whatsapp
23. S13 OR S14 OR S15 OR S16 OR S17 OR S18 OR S19 OR S20 OR S21 OR S22
24. (MM "Unsafe Sex")
25. TI (sexual behavior\*) OR AB (sexual behavior\*)
26. TI (sexual behaviour\*) OR AB (sexual behaviour\*)
27. TI (sex behavior\*) OR AB (sex behavior\*)
28. TI (sex behaviour\*) OR AB (sex behaviour\*)
29. TI (sex\* behavior\*) OR AB (sex\* behavior\*)
30. TI (sexual risk\*) OR AB (sexual risk\*)
31. TI (sexual risk taking) OR AB (sexual risk taking)
32. I (unsafe sex) OR AB (unsafe sex)
33. S24 OR S25 OR S26 OR S27 OR S28 OR S29 OR S30 OR S31 OR S32
34. S12 AND S23 AND S33
35. TI text OR AB text
36. TI text messag\* OR AB text messag\*
37. S23 OR S35 OR S36
38. S12 AND S33 AND S37
