# Supplementary material
Source: PubMed Central journal article supplement (PMC6351208)
Supplement: NIHMS990735-supplement-Supp_AppendixS2.pdf [file NIHMS990735-supplement-Supp_AppendixS2.pdf]

## Appendix S2. Subgroup analyses to explore reasons for heterogeneity

| Variable                             | No. of studies | OR  | 95% CI    | P-value | Cochrane's Q | I <sup>2</sup> (%) |
|--------------------------------------|----------------|-----|-----------|---------|--------------|--------------------|
| <b>Age group</b>                     |                |     |           |         |              |                    |
| 10-14 years                          | 2              | 4.5 | 2.9, 7.1  | 0.41    | 0.7          | --                 |
| 15-19 years                          | 2              | 5.8 | 3.9, 8.7  | 0.10    | 2.7          | 63.3               |
| 10-19 years                          | 2              | 7.8 | 5.5, 11.1 | 0.03    | 4.5          | 77.7               |
| <b>Country</b>                       |                |     |           |         |              |                    |
| Australia                            | 1              | 6.6 | 5.4, 8.1  | 1.00    | 0.00         | --                 |
| United States                        | 5              | 6.1 | 4.3, 8.6  | 0.006   | 14.3         | 71.9               |
| <b>Definition of sexual activity</b> |                |     |           |         |              |                    |
| Current                              | 2              | 5.4 | 2.6, 11.4 | 0.11    | 2.5          | 60.2               |
| Ever                                 | 4              | 6.4 | 4.7, 8.7  | 0.008   | 11.7         | 74.5               |

Abbreviations: OR, Odds Ratio; CI, Confidence interval
