# Supplementary material
Source: PubMed Central journal article supplement (PMC6351208)
Supplement: NIHMS990735-supplement-Supp_AppendixS3.pdf [file NIHMS990735-supplement-Supp_AppendixS3.pdf]

**Appendix S3. Funnel plot for the detection of publication bias**

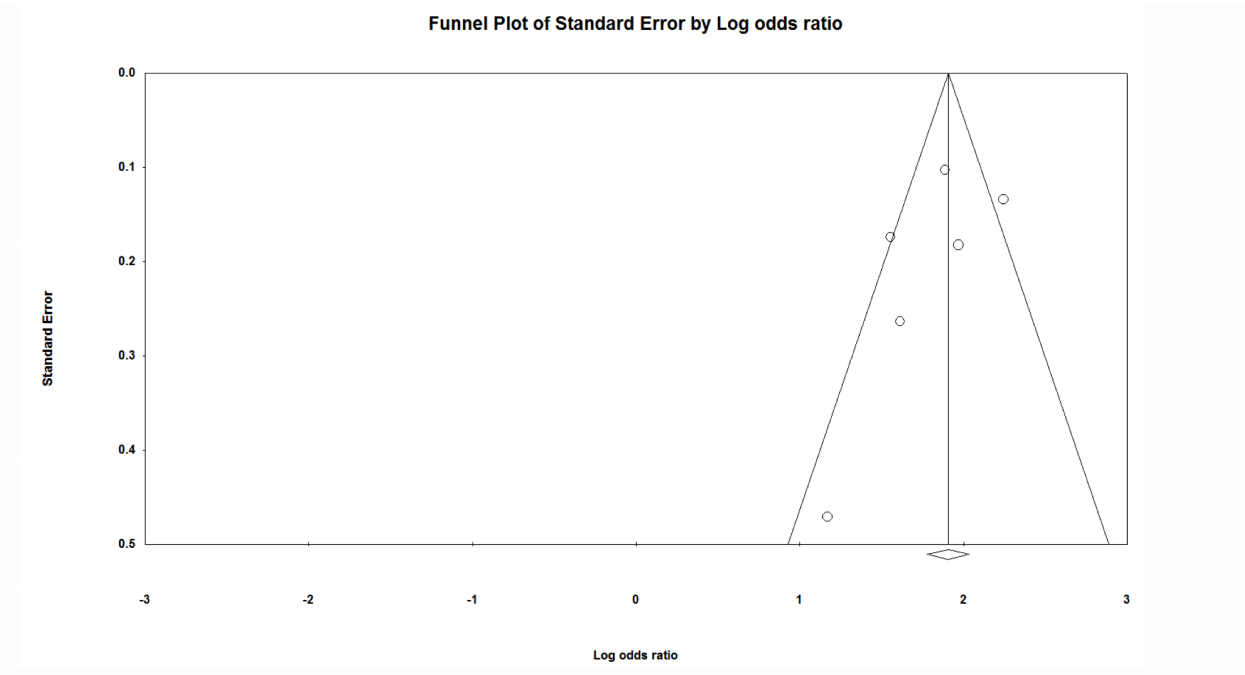

The funnel plot represents the log odds ratio of the association between adolescent sexting and sexual behaviors. The plot shows the standard error of the log odds ratio (Y axis) versus the reported log odds ratio (X axis). The open diamond indicates the pooled log odds ratio and its 95% confidence interval, and the filled diamond indicates the pooled log odds ratio and 95% confidence interval when missing studies suggested by publication bias analysis are included.
